# Supplementary material
Source: MDPI journal article supplement (https://www.mdpi.com/2571-6255/5/2/46)
Supplement: s1 [file s1]

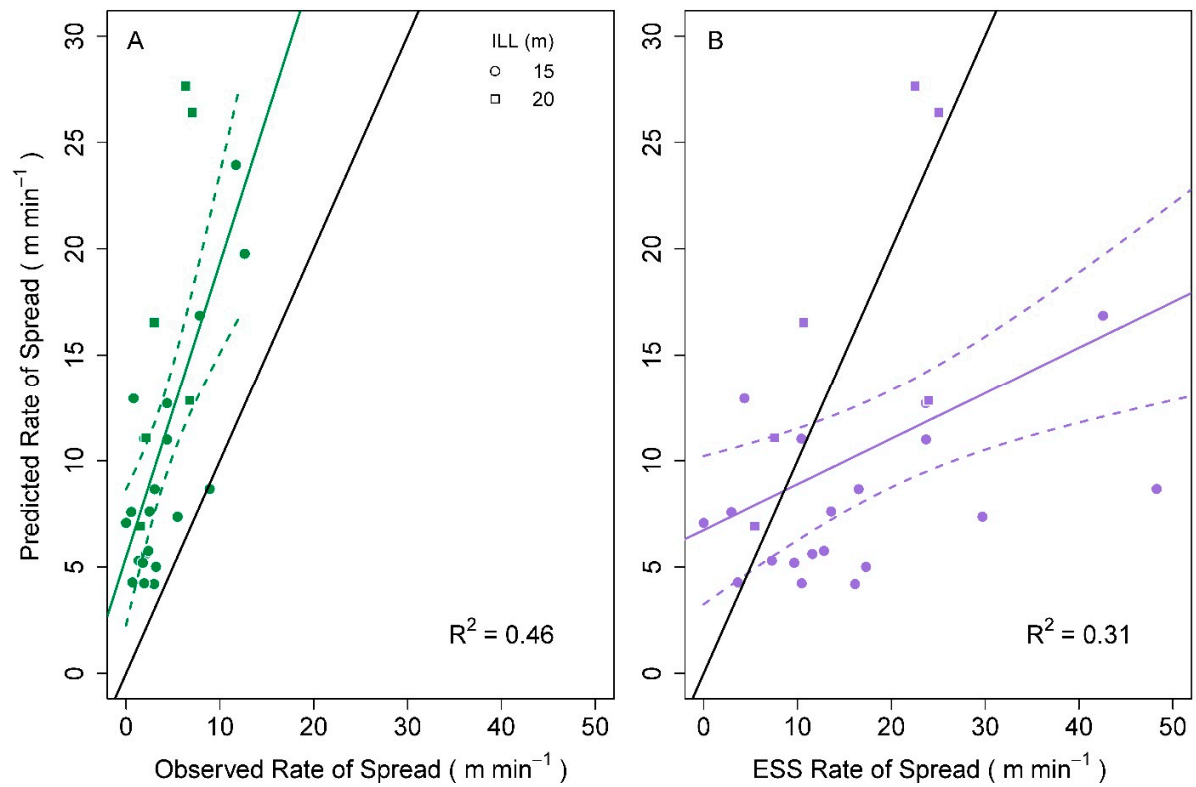

**Figure S1.** Results of linear regression analyses examining the relationship of Anderson v. observed rates of spread (A) alongside Anderson v. corrected rates of spread (B). Coloured lines represent the regression and dashes are 95% confidence intervals. The black line is the 1:1 LPA and individual observations of fire behaviour are shown as dots. ESS is estimated steady state and ILL is ignition line length.

**Table S1.** Fuel structural characteristics for all prescribed burns in Legg et al. [59], including the grouped fuel classes to which they belong.

| Fuel Beds | Model Type | Class  | 1-Hr Fuel Load (t ha <sup>-1</sup> ) | 10-Hr Fuel Load (t ha <sup>-1</sup> ) | 100-Hr Fuel Load (t ha <sup>-1</sup> ) | Live Herb Fuel Load (t ha <sup>-1</sup> ) | Live Woody Fuel Load (t ha <sup>-1</sup> ) | Fuelbed Depth/<br><i>Calluna</i> height (m) | 1-Hr Moisture Content (%) | 10-Hr Moisture Content (%) | 100-Hr Moisture Content (%) | Live Herb Moisture Content (%) | Live Woody Moisture Content (%) | Wind Speed (km hr <sup>-1</sup> ) | Slope (%) | Observed ROS (m min <sup>-1</sup> ) |
|-----------|------------|--------|--------------------------------------|---------------------------------------|----------------------------------------|-------------------------------------------|--------------------------------------------|---------------------------------------------|---------------------------|----------------------------|-----------------------------|--------------------------------|---------------------------------|-----------------------------------|-----------|-------------------------------------|
| High      | Static     | High   | 2.5                                  | 0                                     | 0                                      | 8.0                                       | 5.6                                        | 0.45                                        | 17.00                     | 17.00                      | 17.00                       | 75.00                          | 55.00                           | 5.00                              | 0         | N/A                                 |
| Medium    | Static     | Medium | 2.5                                  | 0                                     | 0                                      | 8.6                                       | 3.6                                        | 0.29                                        | 17.00                     | 17.00                      | 17.00                       | 75.00                          | 55.00                           | 5.00                              | 0         | N/A                                 |
| Low       | Static     | Low    | 1.4                                  | 0                                     | 0                                      | 6.7                                       | 1.9                                        | 0.19                                        | 17.00                     | 17.00                      | 17.00                       | 75.00                          | 55.00                           | 5.00                              | 0         | N/A                                 |
| BE2P1     | Static     | High   | 3.3                                  | 0                                     | 0                                      | 8.0                                       | 8.7                                        | 0.45                                        | 17.21                     | 17.21                      | 17.21                       | 80.71                          | 80.71                           | 11.12                             | 0         | 4.37                                |
| BE2P11    | Static     | High   | 3.0                                  | 0                                     | 0                                      | 10.6                                      | 4.3                                        | 0.45                                        | 17.21                     | 17.21                      | 17.21                       | 60.87                          | 60.87                           | 8.28                              | 0         | 8.91                                |
| BE2P15    | Static     | High   | 2.8                                  | 0                                     | 0                                      | 5.9                                       | 8.7                                        | 0.51                                        | 15.98                     | 15.98                      | 15.98                       | 75.05                          | 75.05                           | 14.62                             | 0         | 7.85                                |
| BE2P20    | Static     | High   | 2.4                                  | 0                                     | 0                                      | 7.6                                       | 5.6                                        | 0.34                                        | 17.21                     | 17.21                      | 17.21                       | 75.43                          | 75.43                           | 5.83                              | 0         | 1.34                                |
| BE2P3     | Static     | High   | 2.3                                  | 0                                     | 0                                      | 8.0                                       | 7.5                                        | 0.47                                        | 17.21                     | 17.21                      | 17.21                       | 55.19                          | 55.19                           | 18.22                             | 0         | 12.64                               |
| BE2P6     | Static     | High   | 2.4                                  | 0                                     | 0                                      | 8.9                                       | 4.5                                        | 0.39                                        | 17.21                     | 17.21                      | 17.21                       | 69.29                          | 69.29                           | 24.91                             | 0         | 11.71                               |
| BE2P8     | Static     | High   | 3.5                                  | 0                                     | 0                                      | 10.6                                      | 8.9                                        | 0.46                                        | 20.68                     | 20.68                      | 20.68                       | 97.18                          | 97.18                           | 15.19                             | 0         | 1.92                                |
| BH4       | Static     | High   | 3.9                                  | 0                                     | 0                                      | 8.1                                       | 5.3                                        | 0.30                                        | 16.53                     | 16.53                      | 16.53                       | 61.18                          | 61.18                           | 17.50                             | 0         | 3.00                                |
| BH7       | Static     | High   | 2.4                                  | 0                                     | 0                                      | 6.5                                       | 3.4                                        | 0.23                                        | 15.67                     | 15.67                      | 15.67                       | 70.45                          | 70.45                           | 31.21                             | 0         | 6.35                                |
| BE2P13    | Static     | Medium | 2.5                                  | 0                                     | 0                                      | 9.5                                       | 4.4                                        | 0.29                                        | 29.00                     | 29.00                      | 29.00                       | 76.90                          | 76.90                           | 16.31                             | 0         | 2.14                                |
| BE2P14    | Static     | Medium | 1.8                                  | 0                                     | 0                                      | 7.9                                       | 4.3                                        | 0.28                                        | 24.35                     | 24.35                      | 24.35                       | 63.65                          | 63.65                           | 8.24                              | 0         | 2.98                                |
| BE2P21    | Static     | Medium | 2.0                                  | 0                                     | 0                                      | 9.1                                       | 3.6                                        | 0.29                                        | 24.35                     | 24.35                      | 24.35                       | 73.92                          | 73.92                           | 8.50                              | 0         | 1.93                                |
| BE2P4     | Static     | Medium | 2.7                                  | 0                                     | 0                                      | 8.7                                       | 3.0                                        | 0.28                                        | 24.35                     | 24.35                      | 24.35                       | 95.11                          | 95.11                           | 16.67                             | 0         | 2.51                                |
| BE2P5     | Static     | Medium | 2.5                                  | 0                                     | 0                                      | 8.2                                       | 2.5                                        | 0.30                                        | 24.35                     | 24.35                      | 24.35                       | 63.34                          | 63.34                           | 14.22                             | 0         | 5.48                                |
| BE2P7     | Static     | Medium | 1.7                                  | 0                                     | 0                                      | 7.3                                       | 2.9                                        | 0.27                                        | 24.35                     | 24.35                      | 24.35                       | 80.15                          | 80.15                           | 27.00                             | 0         | 4.37                                |
| BE2P9     | Static     | Medium | 3.2                                  | 0                                     | 0                                      | 8.6                                       | 5.4                                        | 0.30                                        | 22.68                     | 22.68                      | 22.68                       | 84.32                          | 84.32                           | 10.37                             | 0         | 2.37                                |
| BH1       | Static     | Medium | 1.9                                  | 0                                     | 0                                      | 8.1                                       | 2.6                                        | 0.20                                        | 18.15                     | 18.15                      | 18.15                       | 63.15                          | 63.15                           | 15.52                             | 0         | 2.13                                |
| BH5       | Static     | Medium | 2.8                                  | 0                                     | 0                                      | 10.0                                      | 4.4                                        | 0.29                                        | 27.55                     | 27.55                      | 27.55                       | 66.80                          | 66.80                           | 32.51                             | 0         | 6.76                                |
| BE2P10    | Static     | Low    | 1.6                                  | 0                                     | 0                                      | 4.0                                       | 0.2                                        | 0.12                                        | 19.60                     | 19.60                      | 19.60                       | 87.10                          | 87.10                           | 14.51                             | 0         | 0.00                                |
| BE2P16    | Static     | Low    | 1.3                                  | 0                                     | 0                                      | 6.7                                       | 1.9                                        | 0.19                                        | 27.04                     | 27.04                      | 27.04                       | 91.22                          | 91.22                           | 16.02                             | 0         | 1.78                                |
| BE2P19    | Static     | Low    | 1.4                                  | 0                                     | 0                                      | 6.7                                       | 1.9                                        | 0.21                                        | 19.60                     | 19.60                      | 19.60                       | 93.48                          | 93.48                           | 7.16                              | 0         | 0.67                                |
| BE2P2     | Static     | Low    | 0.9                                  | 0                                     | 0                                      | 5.4                                       | 1.8                                        | 0.19                                        | 19.60                     | 19.60                      | 19.60                       | 87.42                          | 87.42                           | 8.64                              | 0         | 3.19                                |
| BE2P22    | Static     | Low    | 3.3                                  | 0                                     | 0                                      | 7.6                                       | 4.6                                        | 0.25                                        | 16.95                     | 16.95                      | 16.95                       | 73.74                          | 73.74                           | 10.44                             | 0         | 3.05                                |
| BE2P23    | Static     | Low    | 2.2                                  | 0                                     | 0                                      | 9.6                                       | 2.1                                        | 0.27                                        | 19.60                     | 19.60                      | 19.60                       | 62.97                          | 62.97                           | 10.51                             | 0         | 0.54                                |
| BE2P24    | Static     | Low    | 1.0                                  | 0                                     | 0                                      | 6.2                                       | 1.4                                        | 0.20                                        | 19.60                     | 19.60                      | 19.60                       | 71.42                          | 71.42                           | 20.77                             | 0         | 0.80                                |
| BH2       | Static     | Low    | 2.9                                  | 0                                     | 0                                      | 7.2                                       | 0.6                                        | 0.16                                        | 19.54                     | 19.54                      | 19.54                       | 66.70                          | 66.70                           | 11.88                             | 0         | 1.53                                |
| BH3       | Static     | Low    | 1.1                                  | 0                                     | 0                                      | 6.9                                       | 2.1                                        | 0.17                                        | 14.87                     | 14.87                      | 14.87                       | 72.93                          | 72.93                           | 31.50                             | 0         | 7.07                                |

**Table S2.** Fire behaviour summary table used to generate model performance testing versus observed fire behaviour. ‘Fire name’, ‘Class’, ‘Observed’ fire behaviour and their relative fuel structures were from Legg et al. [59]. RMSE values were calculated using the ‘rmse’ function in the R ‘Metrics’ package [63]. Correction RMSE values are for Anderson versus Correction rates of spread.

| Rates of Spread (m min <sup>-1</sup> ) |        |             |             |             |              |               |             |             |             |
|----------------------------------------|--------|-------------|-------------|-------------|--------------|---------------|-------------|-------------|-------------|
| Fire Name                              | Class  | Observed    | Davies 1    | Davies 2    | Anderson     | Correction    | Roth        | BehavePlus  | Farsite     |
| BE2P1                                  | High   | 4.37        | 5.83        | 5.12        | 11.00        | 23.70         | 3.16        | 3.12        | 2.58        |
| BE2P11                                 | High   | 8.91        | 4.41        | 5.73        | 8.67         | 48.28         | 2.32        | 2.35        | 1.94        |
| BE2P15                                 | High   | 7.85        | 9.14        | 8.71        | 16.85        | 42.56         | 6.01        | 6.01        | 4.96        |
| BE2P20                                 | High   | 1.34        | 2.30        | 2.37        | 5.30         | 7.27          | 0.79        | 0.79        | 0.65        |
| BE2P3                                  | High   | 12.64       | 9.78        | 11.23       | 19.77        | 68.51         | 7.42        | 7.35        | 6.07        |
| BE2P6                                  | High   | 11.71       | 9.00        | 9.13        | 23.94        | 63.46         | 11.02       | 9.99        | 8.25        |
| BE2P8                                  | High   | 1.92        | 8.01        | 5.52        | 11.03        | 10.41         | 3.91        | 3.86        | 3.19        |
| BH4                                    | High   | 3.00        | 4.22        | 5.52        | 16.54        | 10.64         | 7.71        | 7.75        | 6.40        |
| BH7                                    | High   | 6.35        | 4.42        | 4.81        | 27.65        | 22.51         | 12.87       | 7.27        | 6.00        |
| BE2P13                                 | Medium | 2.14        | 3.78        | 3.59        | 5.61         | 11.58         | 0.59        | 0.06        | 0.05        |
| BE2P14                                 | Medium | 2.98        | 2.26        | 3.48        | 4.21         | 16.13         | 0.73        | 0.74        | 0.65        |
| BE2P21                                 | Medium | 1.93        | 2.38        | 2.60        | 4.24         | 10.44         | 0.76        | 0.75        | 0.66        |
| BE2P4                                  | Medium | 2.51        | 3.62        | 1.68        | 7.61         | 13.59         | 2.77        | 2.79        | 2.44        |
| BE2P5                                  | Medium | 5.48        | 3.56        | 4.71        | 7.36         | 29.71         | 3.05        | 3.08        | 2.69        |
| BE2P7                                  | Medium | 4.37        | 5.06        | 4.46        | 12.71        | 23.66         | 5.21        | 1.24        | 1.08        |
| BE2P9                                  | Medium | 2.37        | 2.88        | 2.05        | 5.75         | 12.82         | 1.65        | 1.63        | 1.43        |
| BH1                                    | Medium | 2.13        | 2.14        | 3.42        | 11.09        | 7.54          | 2.42        | 2.44        | 2.13        |
| BH5                                    | Medium | 6.76        | 6.77        | 7.33        | 12.85        | 23.96         | 5.21        | 0.64        | 0.56        |
| BE2P10                                 | Low    | 0.00        | 1.23        | 0.26        | 7.07         | 0.00          | 2.11        | 2.16        | 1.89        |
| BE2P16                                 | Low    | 1.78        | 2.01        | 0.58        | 5.19         | 9.65          | 0.73        | 0.12        | 0.11        |
| BE2P19                                 | Low    | 0.67        | 1.50        | 0.11        | 4.28         | 3.64          | 0.49        | 0.48        | 0.42        |
| BE2P2                                  | Low    | 3.19        | 1.44        | 0.43        | 5.01         | 17.30         | 0.48        | 0.46        | 0.40        |
| BE2P22                                 | Low    | 3.05        | 2.26        | 2.50        | 8.66         | 16.52         | 2.18        | 2.16        | 1.89        |
| BE2P23                                 | Low    | 0.54        | 2.51        | 3.78        | 7.58         | 2.95          | 1.8         | 1.77        | 1.55        |
| BE2P24                                 | Low    | 0.80        | 2.61        | 3.05        | 12.94        | 4.34          | 2.85        | 0.70        | 0.61        |
| BH2                                    | Low    | 1.53        | 1.43        | 2.42        | 6.91         | 5.43          | 2.2         | 2.26        | 1.98        |
| BH3                                    | Low    | 7.07        | 2.84        | 3.11        | 26.41        | 25.04         | 4.8         | 3.81        | 3.34        |
| Mean ± Standard Deviation              | High   | 6.46 ± 4.14 | 6.34 ± 2.69 | 6.46 ± 2.70 | 15.64 ± 7.34 | 33.04 ± 23.41 | 6.31 ± 4.04 | 5.39 ± 3.01 | 4.45 ± 2.48 |
|                                        | Medium | 3.41 ± 1.73 | 3.60 ± 1.51 | 3.70 ± 1.69 | 7.94 ± 3.45  | 16.60 ± 7.46  | 2.49 ± 1.79 | 1.49 ± 1.07 | 1.30 ± 0.93 |
|                                        | Low    | 2.07 ± 2.17 | 1.98 ± 0.60 | 1.80 ± 1.44 | 9.34 ± 6.89  | 9.43 ± 8.38   | 1.96 ± 1.36 | 1.55 ± 1.20 | 1.36 ± 1.05 |
|                                        | All    | 3.98 ± 3.34 | 3.98 ± 2.53 | 3.99 ± 2.75 | 10.97 ± 6.82 | 19.69 ± 17.57 | 3.53 ± 3.19 | 2.81 ± 2.65 | 2.37 ± 2.18 |
| RMSE Versus Observed                   |        | High        | 3.03        | 2.18        | 10.86        | 26.66         | 10.86       | 3.44        | 3.79        |
|                                        |        | Medium      | 1.01        | 0.83        | 5.24         | 10.84         | 5.24        | 2.68        | 2.77        |
|                                        |        | Low         | 1.86        | 2.15        | 8.88         | 6.52          | 1.67        | 2.56        | 2.56        |
|                                        |        | All         | 2.13        | 1.83        | 8.64         | 17.03         | 2.64        | 2.92        | 3.09        |

**Table S3.** TukeyHSD post-hoc analyses following the ANOVA for rate of spread versus fire behaviour model and fuel class for observed fire behaviour comparisons. Fuel classes are assigned groupings from Legg et al. [59]. CI 95s are 95 % confidence intervals for a given factor interaction. Adjusted  $p$  is a significance value adjusted for each interaction at  $\alpha = 0.05$ .

| Factor Comparison     | Difference | Lower CI 95 | Upper CI 95 | Adjusted $p$ |
|-----------------------|------------|-------------|-------------|--------------|
| Fire Behaviour Model  |            |             |             |              |
| Davies 1 - Davies 2   | 0.01       | -2.42       | 2.45        | 1.0000       |
| Davies 1 - Anderson   | -6.99      | -9.43       | -4.56       | < 0.0001     |
| Davies 1 - Roth       | -0.45      | -2.90       | 2.00        | 0.9949       |
| Davies 1 - BehavePlus | 1.29       | -1.15       | 3.72        | 0.6478       |
| Davies 1 - Farsite    | -1.71      | -4.15       | 0.72        | 0.3309       |
| Davies 2 - Anderson   | -6.98      | -9.42       | -4.55       | < 0.0001     |
| Davies 2 - Roth       | -0.46      | -2.91       | 1.99        | 0.9943       |
| Davies 2 - BehavePlus | 1.30       | -1.14       | 3.73        | 0.6389       |
| Davies 2 - Farsite    | -1.72      | -4.16       | 0.71        | 0.3233       |
| Anderson - Roth       | -7.44      | -9.89       | -4.99       | < 0.0001     |
| Anderson - BehavePlus | -8.28      | -10.72      | -5.85       | < 0.0001     |
| Anderson - Farsite    | -8.71      | -11.14      | -6.27       | < 0.0001     |
| Roth - BehavePlus     | 0.84       | -1.62       | 3.29        | 0.9218       |
| Roth - Farsite        | 1.26       | -1.19       | 3.71        | 0.6743       |
| BehavePlus - Farsite  | -0.42      | -2.86       | 2.01        | 0.9960       |
| Fuel Class            |            |             |             |              |
| High - Medium         | -3.98      | -5.40       | -2.56       | < 0.0001     |
| High - Low            | -4.51      | -5.94       | -3.09       | < 0.0001     |
| Medium - Low          | 0.53       | -0.89       | 1.95        | 0.6516       |

**Table S4.** TukeyHSD post-hoc analyses following the sensitivity analysis ANOVA. Fuel classes are assigned groupings from Legg et al. [59]. CI 95s are 95 % confidence intervals for a given factor interaction. Adjusted  $p$  is a significance value adjusted for each interaction at  $\alpha = 0.05$ .

| Factor Comparison     | Difference | Lower CI 95 | Upper CI 95 | Adjusted $p$ |
|-----------------------|------------|-------------|-------------|--------------|
| Fire Behaviour Model  |            |             |             |              |
| Davies 1 - Davies 2   | -0.01      | -0.95       | 0.93        | 1.0000       |
| Davies 1 - Anderson   | -8.15      | -9.09       | -7.21       | < 0.0001     |
| Davies 1 - Roth       | -0.56      | -1.49       | 0.38        | 0.5380       |
| Davies 1 - BehavePlus | 0.56       | -0.38       | 1.50        | 0.5322       |
| Davies 1 - Farsite    | -1.08      | -2.02       | -0.14       | 0.0140       |
| Davies 2 - Anderson   | -8.16      | -9.10       | -7.22       | < 0.0001     |
| Davies 2 - Roth       | -0.54      | -1.48       | 0.39        | 0.5602       |
| Davies 2 - BehavePlus | 0.55       | -0.39       | 1.49        | 0.5544       |
| Davies 2 - Farsite    | -1.07      | -2.00       | -0.13       | 0.0156       |
| Anderson - Roth       | -8.71      | -9.65       | -7.77       | < 0.0001     |
| Anderson - BehavePlus | -8.71      | -9.65       | -7.77       | < 0.0001     |
| Anderson - Farsite    | -9.23      | -10.17      | -8.29       | < 0.0001     |
| Roth - BehavePlus     | 0.00       | -0.94       | 0.94        | 1.0000       |
| Roth - Farsite        | 0.52       | -0.42       | 1.46        | 0.6094       |
| BehavePlus - Farsite  | -0.52      | -1.46       | 0.42        | 0.6152       |
| Fuel Class            |            |             |             |              |
| High - Medium         | -2.19      | -2.74       | -1.65       | < 0.0001     |
| High - Low            | -3.80      | -4.35       | -3.26       | < 0.0001     |
| Medium - Low          | 1.61       | 1.06        | 2.15        | < 0.0001     |

**Table S5.** Fire behaviour summary table used to generate all sensitivity analyses. Fuel classes are assigned groupings from Legg et al. [59]. LWPMC is live woody fuel moisture content. High fuel structure fire behaviour.

| Fuel Class | Wind Speed (km hr <sup>-1</sup> ) | LWPMC (%) | Rates of Spread (m min <sup>-1</sup> ) |          |       |            |         |          |
|------------|-----------------------------------|-----------|----------------------------------------|----------|-------|------------|---------|----------|
|            |                                   |           | Davies 1                               | Davies 2 | Roth  | BehavePlus | Farsite | Anderson |
| High       | 5                                 | 95        | 2.97                                   | 1.10     | 0.84  | 0.84       | 0.62    | 4.80     |
| High       | 5                                 | 85        | 2.97                                   | 2.07     | 0.84  | 0.84       | 0.62    | 4.95     |
| High       | 5                                 | 75        | 2.97                                   | 3.04     | 0.85  | 0.84       | 0.63    | 5.10     |
| High       | 5                                 | 65        | 2.97                                   | 4.01     | 0.85  | 0.85       | 0.63    | 5.27     |
| High       | 5                                 | 55        | 2.97                                   | 4.98     | 0.85  | 0.85       | 0.63    | 5.43     |
| High       | 7                                 | 95        | 3.85                                   | 1.90     | 1.42  | 1.42       | 1.12    | 6.70     |
| High       | 7                                 | 85        | 3.85                                   | 2.87     | 1.43  | 1.43       | 1.12    | 6.91     |
| High       | 7                                 | 75        | 3.85                                   | 3.84     | 1.43  | 1.43       | 1.13    | 7.13     |
| High       | 7                                 | 65        | 3.85                                   | 4.81     | 1.44  | 1.44       | 1.13    | 7.36     |
| High       | 7                                 | 55        | 3.85                                   | 5.78     | 1.45  | 1.45       | 1.14    | 7.59     |
| High       | 9                                 | 95        | 4.72                                   | 2.71     | 2.15  | 2.14       | 1.70    | 8.60     |
| High       | 9                                 | 85        | 4.72                                   | 3.68     | 2.16  | 2.15       | 1.71    | 8.87     |
| High       | 9                                 | 75        | 4.72                                   | 4.65     | 2.17  | 2.16       | 1.72    | 9.16     |
| High       | 9                                 | 65        | 4.72                                   | 5.62     | 2.18  | 2.17       | 1.73    | 9.45     |
| High       | 9                                 | 55        | 4.72                                   | 6.59     | 2.19  | 2.18       | 1.74    | 9.75     |
| High       | 11                                | 95        | 5.59                                   | 3.51     | 3.01  | 3.01       | 2.39    | 10.50    |
| High       | 11                                | 85        | 5.59                                   | 4.48     | 3.02  | 3.02       | 2.39    | 10.83    |
| High       | 11                                | 75        | 5.59                                   | 5.45     | 3.04  | 3.03       | 2.41    | 11.18    |
| High       | 11                                | 65        | 5.59                                   | 6.42     | 3.05  | 3.05       | 2.41    | 11.53    |
| High       | 11                                | 55        | 5.59                                   | 7.39     | 3.06  | 3.06       | 2.42    | 11.90    |
| High       | 13                                | 95        | 6.47                                   | 4.31     | 4.00  | 4.00       | 3.19    | 12.40    |
| High       | 13                                | 85        | 6.47                                   | 5.28     | 4.02  | 4.01       | 3.20    | 12.79    |
| High       | 13                                | 75        | 6.47                                   | 6.25     | 4.04  | 4.03       | 3.21    | 13.20    |
| High       | 13                                | 65        | 6.47                                   | 7.22     | 4.05  | 4.05       | 3.22    | 13.62    |
| High       | 13                                | 55        | 6.47                                   | 8.19     | 4.07  | 4.07       | 3.24    | 14.05    |
| High       | 15                                | 95        | 7.34                                   | 5.12     | 5.11  | 5.11       | 4.08    | 14.29    |
| High       | 15                                | 85        | 7.34                                   | 6.09     | 5.14  | 5.13       | 4.10    | 14.75    |
| High       | 15                                | 75        | 7.34                                   | 7.06     | 5.16  | 5.16       | 4.12    | 15.21    |
| High       | 15                                | 65        | 7.34                                   | 8.03     | 5.19  | 5.18       | 4.15    | 15.70    |
| High       | 15                                | 55        | 7.34                                   | 9.00     | 5.21  | 5.21       | 4.18    | 16.20    |
| High       | 17                                | 95        | 8.21                                   | 5.92     | 6.35  | 6.35       | 5.22    | 16.18    |
| High       | 17                                | 85        | 8.21                                   | 6.89     | 6.38  | 6.37       | 5.24    | 16.70    |
| High       | 17                                | 75        | 8.21                                   | 7.86     | 6.41  | 6.40       | 5.27    | 17.23    |
| High       | 17                                | 65        | 8.21                                   | 8.83     | 6.44  | 6.43       | 5.30    | 17.78    |
| High       | 17                                | 55        | 8.21                                   | 9.80     | 6.47  | 6.46       | 5.33    | 18.34    |
| High       | 19                                | 95        | 9.09                                   | 6.72     | 7.70  | 7.70       | 6.45    | 18.08    |
| High       | 19                                | 85        | 9.09                                   | 7.69     | 7.74  | 7.73       | 6.47    | 18.65    |
| High       | 19                                | 75        | 9.09                                   | 8.66     | 7.77  | 7.77       | 6.50    | 19.24    |
| High       | 19                                | 65        | 9.09                                   | 9.63     | 7.81  | 7.80       | 6.53    | 19.86    |
| High       | 19                                | 55        | 9.09                                   | 10.60    | 7.85  | 7.84       | 6.56    | 20.49    |
| High       | 21                                | 95        | 9.96                                   | 7.53     | 9.17  | 9.16       | 7.71    | 19.97    |
| High       | 21                                | 85        | 9.96                                   | 8.50     | 9.21  | 9.20       | 7.75    | 20.60    |
| High       | 21                                | 75        | 9.96                                   | 9.47     | 9.25  | 9.25       | 7.80    | 21.26    |
| High       | 21                                | 65        | 9.96                                   | 10.44    | 9.30  | 9.29       | 7.85    | 21.93    |
| High       | 21                                | 55        | 9.96                                   | 11.41    | 9.34  | 9.33       | 7.90    | 22.63    |
| High       | 23                                | 95        | 10.83                                  | 8.33     | 10.75 | 10.74      | 9.15    | 21.86    |
| High       | 23                                | 85        | 10.83                                  | 9.30     | 10.80 | 10.79      | 9.20    | 22.55    |
| High       | 23                                | 75        | 10.83                                  | 10.27    | 10.84 | 10.84      | 9.25    | 23.27    |
| High       | 23                                | 65        | 10.83                                  | 11.24    | 10.89 | 10.89      | 9.30    | 24.01    |
| High       | 23                                | 55        | 10.83                                  | 12.21    | 10.95 | 10.94      | 9.35    | 24.77    |

**Table S5, continued.** Medium fuel structure fire behaviour.

|        |    |    |      |      |      |      |      |       |
|--------|----|----|------|------|------|------|------|-------|
| Medium | 5  | 95 | 1.71 | 0.00 | 0.58 | 0.58 | 0.47 | 4.08  |
| Medium | 5  | 85 | 1.71 | 0.90 | 0.58 | 0.58 | 0.47 | 4.21  |
| Medium | 5  | 75 | 1.71 | 1.87 | 0.58 | 0.58 | 0.48 | 4.34  |
| Medium | 5  | 65 | 1.71 | 2.84 | 0.58 | 0.58 | 0.47 | 4.48  |
| Medium | 5  | 55 | 1.71 | 3.81 | 0.59 | 0.59 | 0.48 | 4.62  |
| Medium | 7  | 95 | 2.07 | 0.27 | 0.98 | 0.98 | 0.83 | 5.70  |
| Medium | 7  | 85 | 2.07 | 1.24 | 0.98 | 0.98 | 0.83 | 5.88  |
| Medium | 7  | 75 | 2.07 | 2.21 | 0.99 | 0.99 | 0.84 | 6.07  |
| Medium | 7  | 65 | 2.07 | 3.18 | 0.99 | 0.99 | 0.84 | 6.26  |
| Medium | 7  | 55 | 2.07 | 4.15 | 0.99 | 0.99 | 0.84 | 6.46  |
| Medium | 9  | 95 | 2.44 | 0.61 | 1.49 | 1.49 | 1.27 | 7.32  |
| Medium | 9  | 85 | 2.44 | 1.58 | 1.49 | 1.49 | 1.27 | 7.55  |
| Medium | 9  | 75 | 2.44 | 2.55 | 1.49 | 1.49 | 1.27 | 7.79  |
| Medium | 9  | 65 | 2.44 | 3.52 | 1.50 | 1.50 | 1.28 | 8.04  |
| Medium | 9  | 55 | 2.44 | 4.49 | 1.50 | 1.50 | 1.28 | 8.29  |
| Medium | 11 | 95 | 2.80 | 0.94 | 2.09 | 2.08 | 1.77 | 8.93  |
| Medium | 11 | 85 | 2.80 | 1.91 | 2.09 | 2.09 | 1.78 | 9.22  |
| Medium | 11 | 75 | 2.80 | 2.88 | 2.10 | 2.10 | 1.79 | 9.51  |
| Medium | 11 | 65 | 2.80 | 3.85 | 2.10 | 2.10 | 1.78 | 9.81  |
| Medium | 11 | 55 | 2.80 | 4.82 | 2.11 | 2.11 | 1.79 | 10.12 |
| Medium | 13 | 95 | 3.17 | 1.28 | 2.78 | 2.78 | 2.38 | 10.55 |
| Medium | 13 | 85 | 3.17 | 2.25 | 2.79 | 2.78 | 2.38 | 10.88 |
| Medium | 13 | 75 | 3.17 | 3.22 | 2.79 | 2.79 | 2.38 | 11.23 |
| Medium | 13 | 65 | 3.17 | 4.19 | 2.80 | 2.80 | 2.39 | 11.58 |
| Medium | 13 | 55 | 3.17 | 5.16 | 2.81 | 2.81 | 2.40 | 11.95 |
| Medium | 15 | 95 | 3.54 | 1.62 | 3.56 | 3.56 | 3.05 | 12.16 |
| Medium | 15 | 85 | 3.54 | 2.59 | 3.57 | 3.57 | 3.06 | 12.54 |
| Medium | 15 | 75 | 3.54 | 3.56 | 3.58 | 3.58 | 3.06 | 12.94 |
| Medium | 15 | 65 | 3.54 | 4.53 | 3.59 | 3.59 | 3.08 | 13.35 |
| Medium | 15 | 55 | 3.54 | 5.50 | 3.60 | 3.60 | 3.09 | 13.78 |
| Medium | 17 | 95 | 3.90 | 1.95 | 4.43 | 4.42 | 3.86 | 13.77 |
| Medium | 17 | 85 | 3.90 | 2.92 | 4.44 | 4.44 | 3.88 | 14.21 |
| Medium | 17 | 75 | 3.90 | 3.89 | 4.45 | 4.45 | 3.89 | 14.66 |
| Medium | 17 | 65 | 3.90 | 4.86 | 4.46 | 4.46 | 3.90 | 15.12 |
| Medium | 17 | 55 | 3.90 | 5.83 | 4.48 | 4.47 | 3.91 | 15.60 |
| Medium | 19 | 95 | 4.27 | 2.29 | 5.38 | 5.38 | 4.76 | 15.38 |
| Medium | 19 | 85 | 4.27 | 3.26 | 5.39 | 5.39 | 4.76 | 15.87 |
| Medium | 19 | 75 | 4.27 | 4.23 | 5.41 | 5.41 | 4.78 | 16.37 |
| Medium | 19 | 65 | 4.27 | 5.20 | 5.42 | 5.42 | 4.79 | 16.89 |
| Medium | 19 | 55 | 4.27 | 6.17 | 5.44 | 5.44 | 4.80 | 17.43 |
| Medium | 21 | 95 | 4.63 | 2.63 | 6.41 | 6.41 | 5.69 | 16.99 |
| Medium | 21 | 85 | 4.63 | 3.60 | 6.43 | 6.43 | 5.71 | 17.53 |
| Medium | 21 | 75 | 4.63 | 4.57 | 6.45 | 6.44 | 5.72 | 18.08 |
| Medium | 21 | 65 | 4.63 | 5.54 | 6.47 | 6.46 | 5.74 | 18.66 |
| Medium | 21 | 55 | 4.63 | 6.51 | 6.49 | 6.48 | 5.77 | 19.25 |
| Medium | 23 | 95 | 5.00 | 2.96 | 7.53 | 7.52 | 6.73 | 18.59 |
| Medium | 23 | 85 | 5.00 | 3.93 | 7.55 | 7.54 | 6.75 | 19.18 |
| Medium | 23 | 75 | 5.00 | 4.90 | 7.57 | 7.56 | 6.77 | 19.79 |
| Medium | 23 | 65 | 5.00 | 5.87 | 7.59 | 7.59 | 6.80 | 20.42 |
| Medium | 23 | 55 | 5.00 | 6.84 | 7.61 | 7.61 | 6.82 | 21.07 |

**Table S5, continued.** Low fuel structure fire behaviour and summary statistics. RMSE values were calculated using the 'rmse' function in the R 'Metrics' package [63].

|                                 |                 |             |             |             |             |             |              |       |
|---------------------------------|-----------------|-------------|-------------|-------------|-------------|-------------|--------------|-------|
| Low                             | 5               | 95          | 1.17        | 0.00        | 0.30        | 0.30        | 0.25         | 3.46  |
| Low                             | 5               | 85          | 1.17        | 0.41        | 0.30        | 0.30        | 0.25         | 3.57  |
| Low                             | 5               | 75          | 1.17        | 1.38        | 0.30        | 0.30        | 0.25         | 3.69  |
| Low                             | 5               | 65          | 1.17        | 2.35        | 0.30        | 0.30        | 0.25         | 3.80  |
| Low                             | 5               | 55          | 1.17        | 3.32        | 0.30        | 0.30        | 0.25         | 3.93  |
| Low                             | 7               | 95          | 1.32        | 0.00        | 0.50        | 0.50        | 0.43         | 4.84  |
| Low                             | 7               | 85          | 1.32        | 0.55        | 0.50        | 0.50        | 0.42         | 4.99  |
| Low                             | 7               | 75          | 1.32        | 1.52        | 0.50        | 0.50        | 0.43         | 5.15  |
| Low                             | 7               | 65          | 1.32        | 2.49        | 0.50        | 0.50        | 0.42         | 5.32  |
| Low                             | 7               | 55          | 1.32        | 3.46        | 0.50        | 0.50        | 0.42         | 5.49  |
| Low                             | 9               | 95          | 1.48        | 0.00        | 0.76        | 0.76        | 0.65         | 6.21  |
| Low                             | 9               | 85          | 1.48        | 0.69        | 0.76        | 0.76        | 0.65         | 6.41  |
| Low                             | 9               | 75          | 1.48        | 1.66        | 0.76        | 0.76        | 0.65         | 6.61  |
| Low                             | 9               | 65          | 1.48        | 2.63        | 0.76        | 0.76        | 0.65         | 6.82  |
| Low                             | 9               | 55          | 1.48        | 3.60        | 0.76        | 0.76        | 0.65         | 7.04  |
| Low                             | 11              | 95          | 1.63        | 0.00        | 1.06        | 1.06        | 0.91         | 7.58  |
| Low                             | 11              | 85          | 1.63        | 0.83        | 1.07        | 1.07        | 0.91         | 7.83  |
| Low                             | 11              | 75          | 1.63        | 1.80        | 1.07        | 1.07        | 0.92         | 8.07  |
| Low                             | 11              | 65          | 1.63        | 2.77        | 1.07        | 1.07        | 0.91         | 8.33  |
| Low                             | 11              | 55          | 1.63        | 3.74        | 1.07        | 1.07        | 0.91         | 8.60  |
| Low                             | 13              | 95          | 1.78        | 0.00        | 1.42        | 1.42        | 1.22         | 8.95  |
| Low                             | 13              | 85          | 1.78        | 0.97        | 1.42        | 1.42        | 1.22         | 9.24  |
| Low                             | 13              | 75          | 1.78        | 1.94        | 1.42        | 1.42        | 1.22         | 9.53  |
| Low                             | 13              | 65          | 1.78        | 2.91        | 1.43        | 1.42        | 1.21         | 9.84  |
| Low                             | 13              | 55          | 1.78        | 3.88        | 1.43        | 1.43        | 1.22         | 10.15 |
| Low                             | 15              | 95          | 1.93        | 0.14        | 1.82        | 1.82        | 1.56         | 10.32 |
| Low                             | 15              | 85          | 1.93        | 1.11        | 1.82        | 1.82        | 1.56         | 10.65 |
| Low                             | 15              | 75          | 1.93        | 2.08        | 1.83        | 1.82        | 1.56         | 10.99 |
| Low                             | 15              | 65          | 1.93        | 3.05        | 1.83        | 1.83        | 1.57         | 11.34 |
| Low                             | 15              | 55          | 1.93        | 4.02        | 1.83        | 1.83        | 1.57         | 11.70 |
| Low                             | 17              | 95          | 2.08        | 0.28        | 2.26        | 2.26        | 1.98         | 11.69 |
| Low                             | 17              | 85          | 2.08        | 1.25        | 2.27        | 2.26        | 1.98         | 12.06 |
| Low                             | 17              | 75          | 2.08        | 2.22        | 2.27        | 2.27        | 1.99         | 12.45 |
| Low                             | 17              | 65          | 2.08        | 3.19        | 2.28        | 2.28        | 2.00         | 12.84 |
| Low                             | 17              | 55          | 2.08        | 4.16        | 2.28        | 2.28        | 2.00         | 13.25 |
| Low                             | 19              | 95          | 2.24        | 0.42        | 2.75        | 2.75        | 2.44         | 13.06 |
| Low                             | 19              | 85          | 2.24        | 1.39        | 2.76        | 2.75        | 2.44         | 13.47 |
| Low                             | 19              | 75          | 2.24        | 2.36        | 2.76        | 2.75        | 2.43         | 13.90 |
| Low                             | 19              | 65          | 2.24        | 3.33        | 2.77        | 2.77        | 2.45         | 14.34 |
| Low                             | 19              | 55          | 2.24        | 4.30        | 2.77        | 2.77        | 2.45         | 14.80 |
| Low                             | 21              | 95          | 2.39        | 0.56        | 3.28        | 3.28        | 2.92         | 14.42 |
| Low                             | 21              | 85          | 2.39        | 1.53        | 3.29        | 3.28        | 2.92         | 14.88 |
| Low                             | 21              | 75          | 2.39        | 2.50        | 3.29        | 3.29        | 2.93         | 15.36 |
| Low                             | 21              | 65          | 2.39        | 3.47        | 3.30        | 3.29        | 2.93         | 15.84 |
| Low                             | 21              | 55          | 2.39        | 4.44        | 3.31        | 3.31        | 2.95         | 16.35 |
| Low                             | 23              | 95          | 2.54        | 0.70        | 3.85        | 3.85        | 3.45         | 15.79 |
| Low                             | 23              | 85          | 2.54        | 1.67        | 3.86        | 3.86        | 3.46         | 16.29 |
| Low                             | 23              | 75          | 2.54        | 2.64        | 3.87        | 3.86        | 3.46         | 16.81 |
| Low                             | 23              | 65          | 2.54        | 3.61        | 3.87        | 3.87        | 3.47         | 17.34 |
| Low                             | 23              | 55          | 2.54        | 4.58        | 3.88        | 3.88        | 3.48         | 17.89 |
| Mean ±<br>Standard<br>Deviation | High            | 6.90 ± 2.53 | 6.66 ± 2.71 | 5.10 ± 3.27 | 5.09 ± 3.27 | 4.20 ± 2.81 | 14.21 ± 5.90 |       |
|                                 | Medium          | 3.35 ± 1.06 | 3.39 ± 1.69 | 3.54 ± 2.28 | 3.54 ± 2.28 | 3.10 ± 2.06 | 12.09 ± 5.02 |       |
|                                 | Low             | 1.86 ± 0.44 | 2.06 ± 1.36 | 1.81 ± 1.17 | 1.81 ± 1.17 | 1.58 ± 1.05 | 10.27 ± 4.26 |       |
|                                 | All             | 4.04 ± 2.66 | 4.03 ± 2.79 | 3.48 ± 2.74 | 3.48 ± 2.74 | 2.96 ± 2.35 | 12.19 ± 5.32 |       |
| RMSE                            | Versus Davies 1 | High        |             | 1.99        | 1.99        | 2.75        | 8.04         |       |
|                                 |                 | Medium      |             | 1.24        | 1.24        | 1.04        | 9.58         |       |
|                                 |                 | Low         |             | 0.81        | 0.81        | 0.71        | 9.41         |       |
|                                 |                 | All         |             | 1.42        | 1.42        | 1.74        | 8.97         |       |
|                                 | Versus Davies 2 | High        |             | 2.29        | 2.29        | 2.86        | 8.36         |       |
|                                 |                 | Medium      |             | 1.89        | 1.89        | 1.77        | 9.60         |       |
|                                 |                 | Low         |             | 1.55        | 1.55        | 1.55        | 9.24         |       |
|                                 |                 | All         |             | 1.94        | 1.94        | 2.14        | 9.04         |       |



## References (from main text)

59. Legg, C.J.; Davies, G.M.; Kitchen, K.; Marno, P. *Developing a Fire Danger Rating System for Vegetation Fires in the UK: FireBeaters Phase I final report*; Scottish Wildfire Forum, 2007. <https://era.ed.ac.uk/handle/1842/3011> (accessed 2019-09-23).
68. Hamner, B.; Frasco, M.; LeDell, E. *Package 'Metrics': Evaluation Metrics for Machine Learning*; R Foundation for Statistical Computing: Vienna, Austria, 2018. <https://cran.r-project.org/web/packages/Metrics> (accessed 2020-11-01).
